# Supplementary material
Source: publisher site journal article supplement (https://www.spandidos-publications.com/6608/downloadSupplementary)
Supplement: Supplementary file 1 [file downloadSupplementary]

Table SI. Primer sequences of target genes detected by quantitative PCR.

| Name                 | Primer sequences, 5'-3' |
|----------------------|-------------------------|
| IL-1 $\beta$ F       | ATCAGCCAGGACAGTCAG      |
| IL-1 $\beta$ R       | GAAGCGGTTGCTCATCAG      |
| TLR4 F               | GGTGCCTCCATTTCAGCTCT    |
| TLR4 R               | ACTGCCAGGTCTGAGCAATC    |
| IL-6 F               | CTCCTTCTCCACAAGCGCC     |
| IL-6 R               | GTTGTTTTCTGCCAGTGCCTC   |
| TNF- $\alpha$ F      | TCTCCTTCCTGATCGTGGCA    |
| TNF- $\alpha$ R      | GGGTTTGCTACAACATGGGC    |
| MyD88 F              | ACTTGGAGATCCGGCAACTG    |
| MyD88 R              | CCTTGCTCTGCAGGTAATCA    |
| p65-NF- $\kappa$ B F | AGGCTATCAGTCAGCGCATC    |
| p65-NF- $\kappa$ B R | GATCTTGAGCTCGGCAGTGT    |
| TRIF F               | TTCAGGATGAGGCCCGAAAC    |
| TRIF R               | ATGGTAGGGGACTGGCTGAT    |
| $\beta$ -actin F     | CCTTCCTTCCTGGGCATGG     |
| $\beta$ -actin R     | GATCTTCATTGTGCTGGGTGC   |

F, forward; MyD88, myeloid differentiation factor 88; R, reverse; TLR4, Toll-like receptor 4;
